# Supplementary material for: Robotic Parenchymal-Sparing Pancreatectomy: A Systematic Review
Source: MDPI journal article supplement (doi:10.3390/cancers15174369), 2023-09-01
Supplement: s1 [file s1]

## **File S1: Search Terms and Strategy**

Protocol registered using INPLASTY

Article types to include:

- Clinical studies
- Comparative studies
- Clinical trials
- Observational studies

Article types to exclude:

- Guidelines
- Case series
- Case reports
- Lectures
- Review articles
- Systematic reviews +/- Meta-Analyses

Databases:

- PubMed
- Embase
- Google Scholar

Criteria:

- Study has to have  $\geq 5$  patients enrolled
- Study must be published after the year 2001 (year of first reported pancreatic surgery)
- Study must be a retrospective comparison
- Enucleation to Enucleation
- Central to Central
- Synthesize the data from there

Exclude:

- Case reports
- Case series
- Reviews
- Other Systematic Reviews

### **Pancreas Search Terms:**

(((((pancreas[MeSH Terms]) OR (pancreas[Title/Abstract])) OR (pancrea\*[Title/Abstract])) OR (pancreatic[Title/Abstract])) OR (pancreat\*[Title/Abstract])) OR (pancreatectomy[Title/Abstract])) OR (pancreatectomy[MeSH Terms])

### **Search #1: Pancreas**

### **Surgery Search Terms:**

#### **Search #1: Robotic surgery**

(((((minimally invasive surgical procedures[MeSH Terms]) OR (robot[Title/Abstract])) OR (robotic[Title/Abstract])) OR (robot\*[Title/Abstract])) OR ("minimally invasive"[Title/Abstract])) OR ("minimally-invasive"[Title/Abstract]))

#### **Search #2: Enucleations & Centrals**

((((((((((((((((((((((((((((((((((("parenchyma-sparing"[Title/Abstract]) OR ("parenchyma-preserving"[Title/Abstract])) OR ("parenchyma sparing"[Title/Abstract])) OR ("parenchyma preserving"[Title/Abstract])) OR (enucleation[Title/Abstract])) OR (enucleat\*[Title/Abstract])) OR ("parenchyma spar\*[Title/Abstract])) OR ("parenchyma-spar\*[Title/Abstract])) OR ("parenchymal sparing"[Title/Abstract])) OR ("parenchymal-sparing"[Title/Abstract])) OR ("parenchymal-spar\*[Title/Abstract])) OR ("central pancreatectomy"[Title/Abstract])) OR ("central-pancreatectomy"[Title/Abstract])) OR ("central pancreat\*[Title/Abstract])) OR ("central-pancreat\*[Title/Abstract])) OR ("medial pancreatectomy"[Title/Abstract])) OR ("medial-pancreatectomy"[Title/Abstract])) OR ("medial pancreat\*[Title/Abstract])) OR ("medial-pancreat\*[Title/Abstract])) OR ("middle pancreatectomy"[Title/Abstract])) OR ("middle-pancreatectomy"[Title/Abstract])) OR ("middle pancreat\*[Title/Abstract])) OR ("middle-pancreat\*[Title/Abstract])) OR ("intermediate pancreatectomy"[Title/Abstract])) OR ("intermediate-pancreatectomy"[Title/Abstract])) OR ("intermediate pancreat\*[Title/Abstract])) OR ("intermediate-pancreat\*[Title/Abstract])) OR ("meso-pancreatectomy"[Title/Abstract])) OR ("meso pancreatectomy"[Title/Abstract])) OR ("meso pancreat\*[Title/Abstract])) OR ("meso-pancreat\*[Title/Abstract])) OR ("parenchyma-sparing pancreatectomy"[Title/Abstract])) OR ("parenchyma-preserving pancreatectomy"[Title/Abstract])) OR ("parenchyma-sparing pancreat\*[Title/Abstract])) OR ("parenchyma-preserving panceat\*[Title/Abstract])) OR ("parenchyma-sparing pancreatic resection"[Title/Abstract])) OR ("parenchyma-preserving pancreatic resection"[Title/Abstract])) OR ("parenchyma sparing pancreatectomy"[Title/Abstract])) OR ("parenchyma preserving pancreatectomy"[Title/Abstract])) OR ("parenchyma preserving pancreat\*[Title/Abstract])) OR ("parenchyma sparing pancreat\*[Title/Abstract])) OR ("parenchyma sparing pancreatic resection"[Title/Abstract])) OR ("parenchyma preserving pancreatic resection"[Title/Abstract]))

### **PubMed Filters:**

- Year: 2001 – January 2023

- Articles: Full Text Available
- Article Type: Case Reports + Classical Articles + Clinical Trials + Comparative Studies + Multicenter Studies + Observational Studies
- Languages: English
- Preprints Excluded
